# Supplementary material for: AKAP12 deficiency impairs VEGF‐induced endothelial cell migration and sprouting
Source: PubMed Central journal article supplement — Acta Physiol (Oxf). 2019 Jun 21;228(1):e13325. doi: 10.1111/apha.13325 (PMC6916389; doi:10.1111/apha.13325), 2019-06-21
Supplement: APHA-228-na-s001.pdf [file APHA-228-na-s001.pdf]

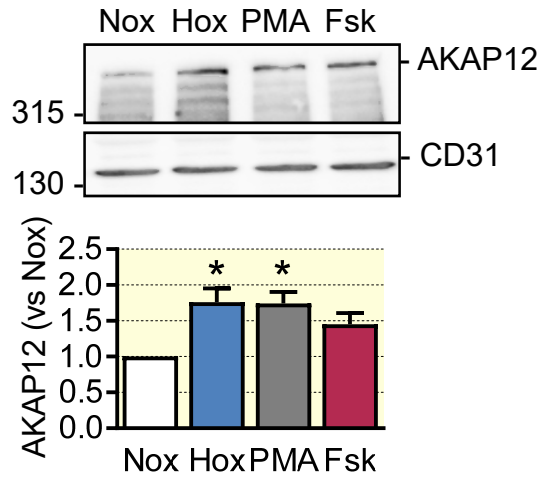

**Figure S1. AKAP12 expression in sub-confluent human endothelial cells.** Effect of normoxia (Nox), hypoxia (Hox, 1% O<sub>2</sub>; 48 hours) on the expression of AKAP12 in sub-confluent cultures of human endothelial cells. PMA (0.1 μmol/L) and forskolin (Fsk, 1 μmol/L) were included as positive controls; n=5 experiments from 5 different batches of endothelial cells (one-way ANOVA with Newman-Keuls multiple comparison test). \*P<0.05 versus Nox.

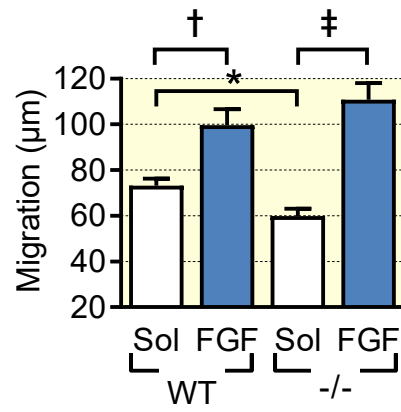

**Figure S2. consequences of AKAP12 deletion on endothelial cell migration in vitro.** Scratch wound assay with mouse lung endothelial cells from wild-type (WT) or AKAP12<sup>-/-</sup> (-/-) mice in the presence of solvent (Sol) or bFGF (10 ng/ml) n=3 different cell preparations per genotype, 6 experiments per preparation; (one-way ANOVA with Newman-Keuls). \*P<0.05, †P<0.01, ‡P<0.001.

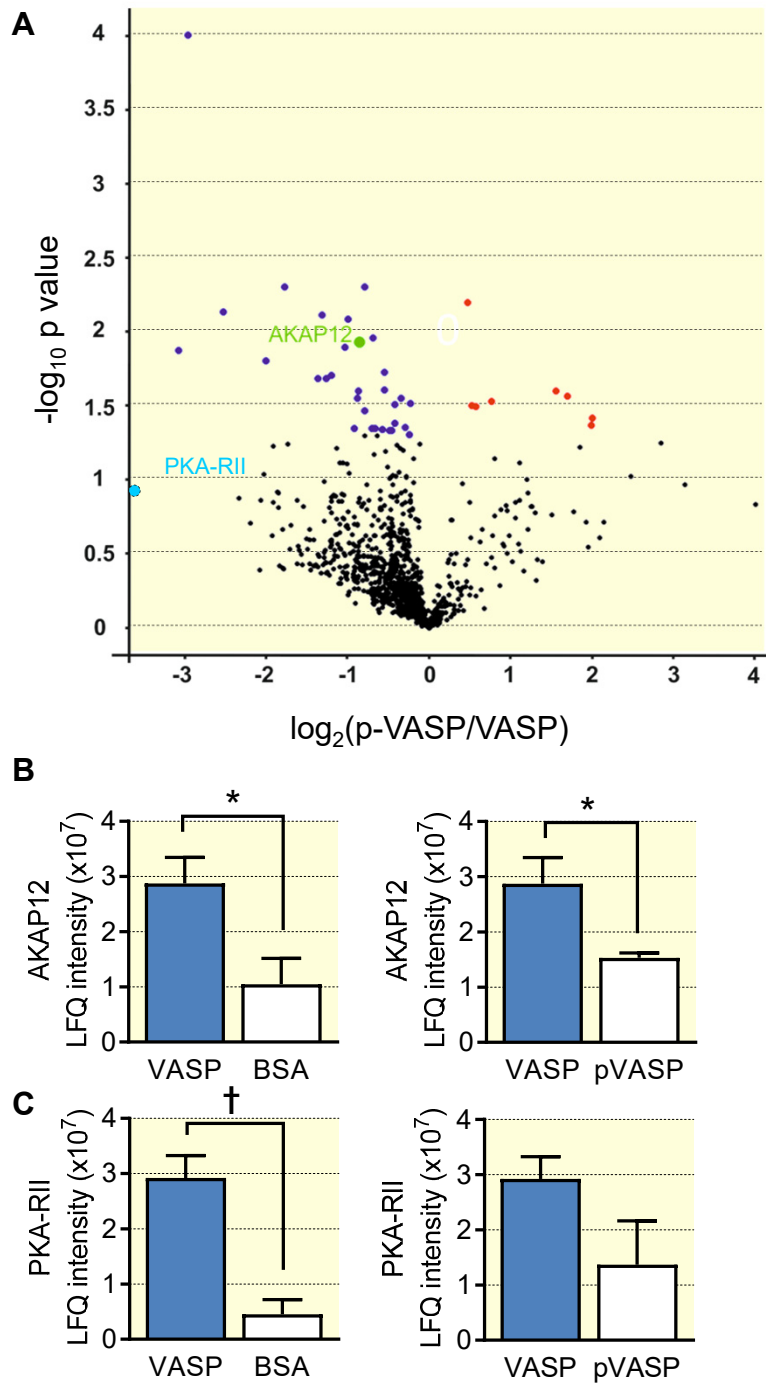

**Figure S3. Pull-downs with human endothelial cells reveal VASP/AKAP12/PKA-RII complex formation.** VASP, Tyr16/Tyr39-phosphorylated VASP (pVASP) or BSA (control) was used to pull-down proteins from human endothelial cells and precipitated proteins were subjected to mass spectrometry analysis. **(A)** Volcano plot showing proteins significantly enriched (purple) or decreased (red) in VASP pull-downs versus pVASP pull-downs. AKAP12 is highlighted in green (n = 4 independent experiments with 6 different cell batches;  $P < 0.05$ ), cAMP-dependent protein kinase type II-alpha regulatory subunit (PKA-RII) is shown in cyan. **(B&C)** Label free quantification (LFQ) intensities of AKAP12 (B) and PKA-RII (C) in pull-downs using VASP, BSA or pVASP as bait (Student's t test). \* $P < 0.05$ , † $P < 0.01$ .

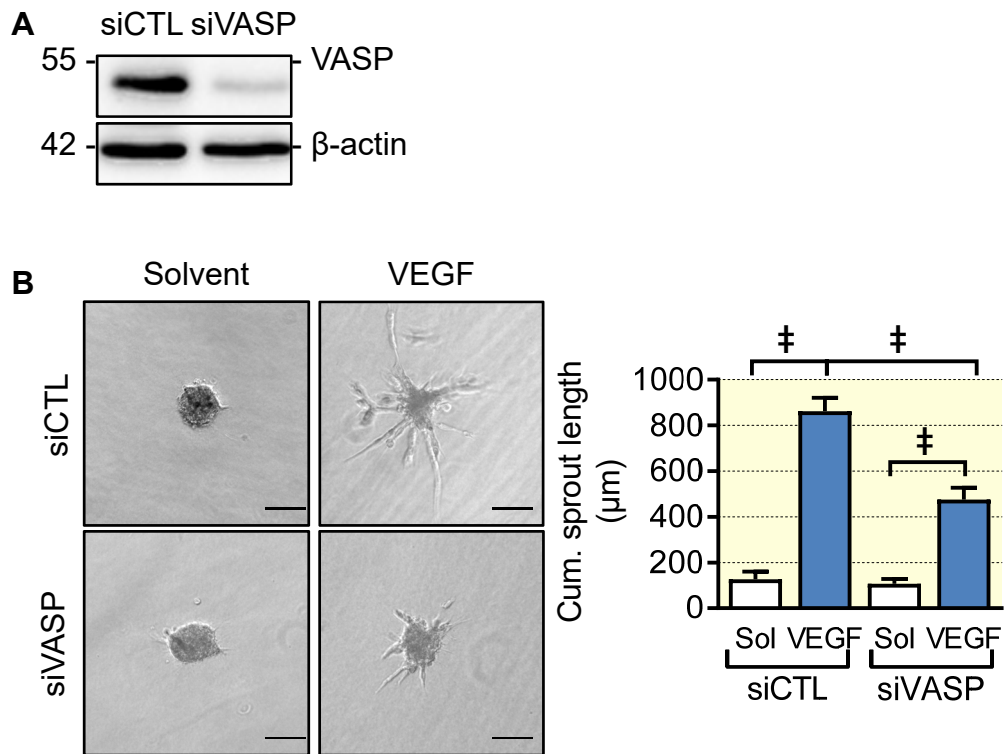

**Figure S4. VASP down-regulation impairs VEGF-induced endothelial sprouting in vitro.** (A) VASP protein expression in human endothelial cells treated with control oligonucleotides (siCTL) or siRNA directed against VASP (siVASP). Comparable results were obtained using 3 additional cell batches. (B) Endothelial cell sprouting in a modified spheroid assay with siCTL or siVASP treated primary cultures of human endothelial cells. Experiments were performed in the absence and presence of VEGF (30 ng/ml); bar=100  $\mu$ m, n=13 different cell preparations (two-way ANOVA with Tukey's test). #P<0.001.

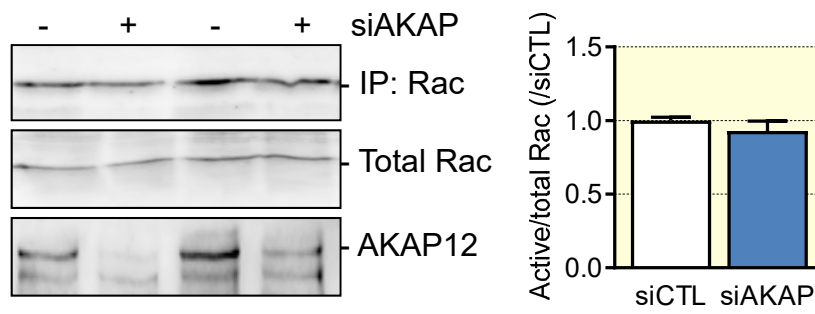

**Figure S5. Consequence of AKAP12 downregulation on VEGF-induced Rac activation in subconfluent endothelial cells.** Human endothelial cells were treated with siRNA against AKAP12 (siAKAP) or control. After 48 hours cells were stimulated with VEGF (50 ng/mL) for 30 minutes. Active RAC was pulled down using GST-tagged PAK-PBD protein on agarose beads, n=3 different cell batches (Students *t* test).
